# Supplementary material for: Dental Diseases Increase Risk of Aortic Arch Calcification Independent of Renal Dysfunction in Older Adults: Shenzhen Community Cohort Study
Source: MDPI journal article supplement (doi:10.3390/metabo12121258), 2022-12-14
Supplement: s1 [file s1]

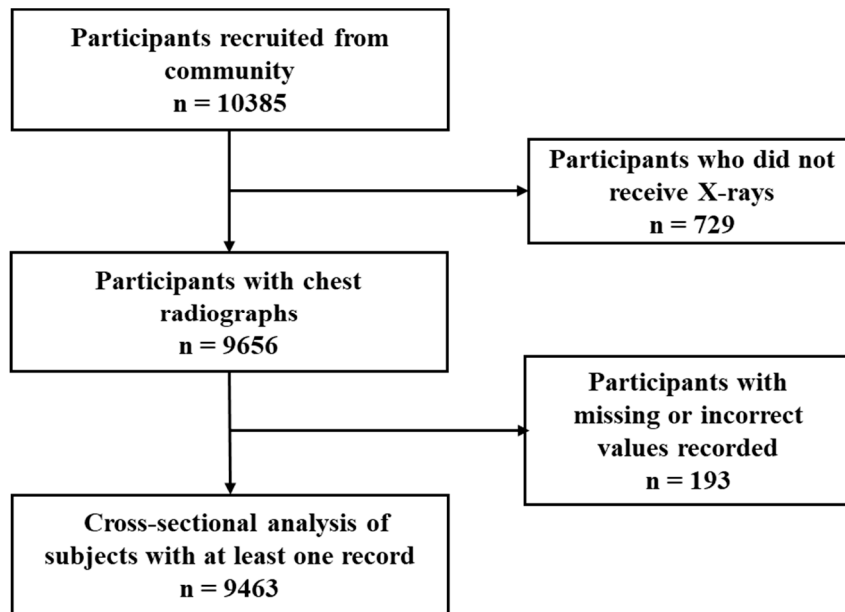

**Figure S1.** Flowchart of data screening and inclusion of the participants of this study.

**Table S1.** Effective association rules when AoAC set to consequent

| Rule                      | Support | Confidence | Lift  |
|---------------------------|---------|------------|-------|
| Age⇒AoAC                  | 49.04%  | 87.40%     | 1.030 |
| Hyperlipidemia⇒AoAC       | 38.33%  | 87.04%     | 1.026 |
| TC⇒AoAC                   | 19.48%  | 86.82%     | 1.023 |
| LDL-C⇒AoAC                | 26.44%  | 86.21%     | 1.016 |
| SBP⇒AoAC                  | 39.28%  | 86.15%     | 1.015 |
| Tooth decay⇒AoAC          | 12.26%  | 85.95%     | 1.013 |
| Hypertension ⇒AoAC        | 80.82%  | 85.85%     | 1.012 |
| Tooth loss or decay ⇒AoAC | 79.78%  | 85.74%     | 1.010 |
| Tooth loss ⇒AoAC          | 76.91%  | 85.66%     | 1.009 |
| DM⇒AoAC                   | 20.74%  | 85.38%     | 1.006 |
| TG⇒AoAC                   | 12.37%  | 85.14%     | 1.003 |
| FPG⇒AoAC                  | 14.73%  | 85.08%     | 1.002 |

Support, Confidence and Lift of association rules are calculated based on the Apriori algorithm. “⇒” is used to indicate the direction of association rules.

SBP indicates systolic blood pressure; TC, total cholesterol; TG, triglyceride; LDL-C, low-density lipoprotein cholesterol; DM, diabetes mellitus; FPG, fasting plasma glucose.

**Table S2.** Baseline characteristics of participants according to presence of tooth loss

|                                     | No tooth loss        | Tooth loss           | <i>P</i> value |
|-------------------------------------|----------------------|----------------------|----------------|
| Number                              | 624                  | 2006                 |                |
| AoAC score                          | 0.06 (0.06, 0.12)    | 0.06 (0.06, 0.12)    | 0.602          |
| Age, years                          | 69.70 ± 4.95         | 71.26 ± 5.26         | <0.001         |
| Female, n (%)                       | 343 (54.97)          | 1129 (56.28)         | 0.595          |
| SBP, mmHg                           | 135.83 ± 16.97       | 136.90 ± 17.58       | 0.183          |
| DBP, mmHg                           | 77.95 ± 10.03        | 76.83 ± 10.34        | 0.018          |
| BMI, kg/m <sup>2</sup>              | 24.08 ± 3.11         | 24.07 ± 3.17         | 0.929          |
| CHD, n (%)                          | 95 (15.22)           | 251 (12.51)          | 0.092          |
| Hypertension, n (%)                 | 444 (71.15)          | 1509 (75.22)         | 0.048          |
| Diabetes Mellitus n (%)             | 156 (25.00)          | 488 (24.33)          | 0.773          |
| Hyperlipidemia, n (%)               | 238 (38.14)          | 703 (35.04)          | 0.173          |
| WBC, 10 <sup>9</sup> /L             | 6.30 (5.40, 7.40)    | 6.30 (5.40, 7.30)    | 0.88           |
| HGB, g/L                            | 134.86 ± 13.23       | 134.18 ± 13.51       | 0.272          |
| PLT, 10 <sup>9</sup> /L             | 212.59 ± 50.73       | 206.76 ± 48.73       | 0.01           |
| TG, mmol/L                          | 1.33 (0.91, 1.81)    | 1.26 (0.93, 1.73)    | 0.267          |
| TC, mmol/L                          | 4.97 (4.35, 5.68)    | 5.01 (4.32, 5.74)    | 0.726          |
| LDL-C, mmol/L                       | 2.89 (2.31, 3.53)    | 2.93 (2.29, 3.55)    | 0.862          |
| HDL-C, mmol/L                       | 1.34 (1.15, 1.58)    | 1.38 (1.16, 1.63)    | 0.102          |
| FPG, mmol/L                         | 5.30 (4.75, 5.99)    | 5.34 (4.80, 6.11)    | 0.084          |
| eGFR, ml/min/1.73m <sup>2</sup>     | 67.44 (61.82, 74.02) | 66.87 (60.52, 73.04) | 0.031          |
| Smoking, n (%)                      | 82 (13.14)           | 301 (15.00)          | 0.277          |
| Drinking, n (%)                     | 135 (21.63)          | 527 (26.27)          | 0.023          |
| Physical activity hours/week, n (%) |                      |                      | 0.231          |
| <3h                                 | 124 (19.87)          | 459 (22.88)          |                |
| 3-10h                               | 435 (69.71)          | 1328 (66.20)         |                |
| >10h                                | 65 (10.42)           | 219 (10.92)          |                |

Continuous variables are summarized as mean ± standard deviation for normally distributed, and median (25th, 75th percentiles) for non-normally distributed. Categorical variables are summarized as count (percentage).

SBP indicates systolic blood pressure; DBP, diastolic blood pressure; BMI, body mass index; CHD, coronary heart disease; WBC, white blood cell count; HGB, hemoglobin; PLT, platelet; TC, total cholesterol; TG, triglyceride; LDL-C, low-density lipoprotein cholesterol; HDL-C, high-density lipoprotein cholesterol; FPG, fasting plasma glucose; eGFR estimated glomerular filtration rate.

**Table S3.** Baseline characteristics of participants according to presence of tooth decay

|                                     | No tooth decay       | Tooth decay          | <i>P</i> value |
|-------------------------------------|----------------------|----------------------|----------------|
| Number                              | 2371                 | 259                  |                |
| AoAC score                          | 0.06 (0.06, 0.12)    | 0.12 (0.06, 0.12)    | 0.551          |
| Age, years                          | 70.89 ± 5.28         | 70.86 ± 4.79         | 0.912          |
| Female, n (%)                       | 1323 (55.80)         | 149 (57.53)          | 0.641          |
| SBP, mmHg                           | 136.43 ± 17.36       | 138.66 ± 18.09       | 0.05           |
| DBP, mmHg                           | 76.96 ± 10.16        | 78.33 ± 11.26        | 0.042          |
| BMI, kg/m <sup>2</sup>              | 24.08 ± 3.14         | 23.97 ± 3.30         | 0.589          |
| CHD, n (%)                          | 317 (13.37)          | 29 (11.20)           | 0.376          |
| Hypertension, n (%)                 | 1765 (74.44)         | 188 (72.59)          | 0.566          |
| Diabetes Mellitus n (%)             | 589 (24.84)          | 55 (21.24)           | 0.228          |
| Hyperlipidemia, n (%)               | 854 (36.02)          | 87 (33.59)           | 0.48           |
| WBC, 10 <sup>9</sup> /L             | 6.30 (5.40, 7.40)    | 6.20 (5.30, 7.20)    | 0.439          |
| HGB, g/L                            | 134.30 ± 13.55       | 134.71 ± 12.45       | 0.641          |
| PLT, 10 <sup>9</sup> /L             | 207.83 ± 49.36       | 211.05 ± 48.30       | 0.318          |
| TG, mmol/L                          | 1.28 (0.93, 1.78)    | 1.21 (0.92, 1.62)    | 0.177          |
| TC, mmol/L                          | 4.99 (4.32, 5.74)    | 5.05 (4.34, 5.70)    | 0.58           |
| LDL-C, mmol/L                       | 2.93 (2.29, 3.54)    | 2.88 (2.36, 3.63)    | 0.433          |
| HDL-C, mmol/L                       | 1.37 (1.16, 1.61)    | 1.41 (1.19, 1.65)    | 0.226          |
| FPG, mmol/L                         | 5.33 (4.79, 6.09)    | 5.29 (4.78, 6.01)    | 0.522          |
| eGFR, ml/min/1.73m <sup>2</sup>     | 66.95 (60.70, 73.23) | 67.20 (62.00, 73.33) | 0.43           |
| Smoking, n (%)                      | 338 (14.26)          | 45 (17.37)           | 0.208          |
| Drinking, n (%)                     | 578 (24.38)          | 84 (32.43)           | 0.006          |
| Physical activity hours/week, n (%) |                      |                      | 0.946          |
| <3h                                 | 527 (22.23)          | 56 (21.62)           |                |
| 3-10h                               | 1587 (66.93)         | 176 (67.95)          |                |
| >10h                                | 257 (10.84)          | 27 (10.42)           |                |

Continuous variables are summarized as mean ± standard deviation for normally distributed, and median (25th, 75th percentiles) for non-normally distributed. Categorical variables are summarized as count (percentage).

SBP indicates systolic blood pressure; DBP, diastolic blood pressure; BMI, body mass index; CHD, coronary heart disease; WBC, white blood cell count; HGB, hemoglobin; PLT, platelet; TC, total cholesterol; TG, triglyceride; LDL-C, low-density lipoprotein cholesterol; HDL-C, high-density lipoprotein cholesterol; FPG, fasting plasma glucose; eGFR estimated glomerular filtration rate.

**Table S4.** Baseline characteristics of participants according to presence of tooth loss or decay

|                                        | No tooth loss or decay | Tooth loss or decay  | <i>P</i> value |
|----------------------------------------|------------------------|----------------------|----------------|
| Number                                 | 567                    | 2063                 |                |
| AoAC score                             | 0.06 (0.06, 0.12)      | 0.06 (0.06, 0.12)    | 0.826          |
| Age, years                             | 69.66 ± 5.05           | 71.23 ± 5.23         | <0.001         |
| Female, n (%)                          | 313 (55.20)            | 1159 (56.18)         | 0.713          |
| SBP, mmHg                              | 135.94 ± 16.94         | 136.84 ± 17.57       | 0.273          |
| DBP, mmHg                              | 77.93 ± 10.04          | 76.87 ± 10.33        | 0.03           |
| BMI, kg/m <sup>2</sup>                 | 24.14 ± 3.11           | 24.05 ± 3.16         | 0.584          |
| CHD, n (%)                             | 91 (16.05)             | 255 (12.36)          | 0.026          |
| Hypertension, n (%)                    | 406 (71.60)            | 1547 (74.99)         | 0.115          |
| Diabetes Mellitus n (%)                | 146 (25.75)            | 498 (24.14)          | 0.463          |
| Hyperlipidemia, n (%)                  | 218 (38.45)            | 723 (35.05)          | 0.148          |
| WBC, 10 <sup>9</sup> /L                | 6.30 (5.40, 7.40)      | 6.30 (5.40, 7.30)    | 0.912          |
| HGB, g/L                               | 134.90 ± 13.30         | 134.19 ± 13.49       | 0.264          |
| PLT, 10 <sup>9</sup> /L                | 212.84 ± 51.30         | 206.86 ± 48.62       | 0.01           |
| TG, mmol/L                             | 1.33 (0.91, 1.83)      | 1.26 (0.93, 1.73)    | 0.322          |
| TC, mmol/L                             | 4.98 (4.39, 5.71)      | 5.00 (4.30, 5.74)    | 0.681          |
| LDL-C, mmol/L                          | 2.94 (2.36, 3.54)      | 2.92 (2.29, 3.55)    | 0.648          |
| HDL-C, mmol/L                          | 1.35 (1.15, 1.58)      | 1.38 (1.16, 1.63)    | 0.208          |
| FPG, mmol/L                            | 5.32 (4.76, 6.02)      | 5.33 (4.79, 6.10)    | 0.34           |
| eGFR, ml/min/1.73m <sup>2</sup>        | 67.66 (61.82, 74.02)   | 66.81 (60.53, 73.06) | 0.038          |
| Smoking, n (%)                         | 69 (12.17)             | 314 (15.22)          | 0.079          |
| Drinking, n (%)                        | 121 (21.34)            | 541 (26.22)          | 0.02           |
| Physical activity<br>hours/week, n (%) |                        |                      | 0.097          |
| <3h                                    | 109 (19.22)            | 474 (22.98)          |                |
| 3-10h                                  | 401 (70.72)            | 1362 (66.02)         |                |
| >10h                                   | 57 (10.05)             | 227 (11.00)          |                |

Continuous variables are summarized as mean ± standard deviation for normally distributed, and median (25th, 75th percentiles) for non-normally distributed. Categorical variables are summarized as count (percentage).

SBP indicates systolic blood pressure; DBP, diastolic blood pressure; BMI, body mass index; CHD, coronary heart disease; WBC, white blood cell count; HGB, hemoglobin; PLT, platelet; TC, total cholesterol; TG, triglyceride; LDL-C, low-density lipoprotein cholesterol; HDL-C, high-density lipoprotein cholesterol; FPG, fasting plasma glucose; eGFR estimated glomerular filtration rate.

**Table S5.** Baseline characteristics of participants according to presence of tooth loss or decay

| Variables           | HR    | 95% CI      | <i>P</i> value |
|---------------------|-------|-------------|----------------|
| <b>Model 1</b>      |       |             |                |
| Tooth loss          | 1.377 | 1.221-1.553 | <0.001         |
| Tooth loss or decay | 1.458 | 1.286-1.652 | <0.001         |
| <b>Model 2</b>      |       |             |                |
| Tooth loss          | 1.352 | 1.199-1.525 | <0.001         |
| Tooth loss or decay | 1.433 | 1.265-1.625 | <0.001         |
| <b>Model 3</b>      |       |             |                |
| Tooth loss          | 1.356 | 1.202-1.530 | <0.001         |
| Tooth loss or decay | 1.437 | 1.267-1.629 | <0.001         |

Model 1: adjusted with age, gender, BMI, SBP, DBP, smoking, drinking.

Model 2: further adjusted with hypertension, hyperlipidemia, diabetes mellitus

Model 3: further adjusted with TG, LDL-C, HDL-C, FPG, eGFR.

HR indicates hazard ratio; CI, confidence interval; BMI, body mass index; SBP, systolic blood pressure; DBP, diastolic blood pressure; TG, triglyceride; LDL-C, low-density lipoprotein cholesterol; HDL-C, high-density lipoprotein; FPG, fasting plasma glucose; eGFR, estimated glomerular filtration rate.
